# Development of a Module for Point-of-care Charge Capture and Submission Using an Anesthesia Information Management System

David L. Reich, M.D.,\* Ronald A. Kahn M.D.,† David Wax, M.D.,‡ Tanuj Palvia, B.S.,§  
Maria Galati, M.B.A.,|| Marina Krol, Ph.D.‡

**CME** This article and its accompanying editorial have been selected for the *Anesthesiology* CME Program. After reading both articles, go to <http://www.asahq.org/journal-cme> to take the test and apply for Category 1 credit. Complete instructions may be found in the CME section at the back of this issue.

**Background:** The use of electronic charge vouchers in anesthesia practice is limited, and the effects on practice management are unreported. The authors hypothesized that the new billing technology would improve the effectiveness of the billing interface and enhance financial practice management measures.

**Methods:** A custom application was created to extract billing elements from the anesthesia information management system. The application incorporates business rules to determine whether individual cases have all required elements for a complete and compliant bill. The metrics of charge lag and days in accounts receivable were assessed before and after the implementation of the electronic charge voucher system.

**Results:** The average charge lag decreased by 7.3 days after full implementation. The total days in accounts receivable, controlling for fee schedule changes and credit balances, decreased by 10.1 days after implementation, representing a one-time revenue gain equivalent to 3.0% of total annual receipts. There are additional ongoing cost savings related to reduction of personnel and expenses related to paper charge voucher handling.

**Conclusions:** Anesthesia information management systems yield financial and operational benefits by speeding up the revenue cycle and by reducing direct costs and compliance risks related to the billing and collection processes. The observed reductions in charge lag and days in accounts receivable may be of benefit in calculating the return on investment that is attributable to the adoption of anesthesia information management systems and electronic charge transmission.

This article is accompanied by an Editorial View. Please see: Abouleish AE, Conlay L: Automated anesthesia charge capture and submission: Wave of the future, or bridge to nowhere? *ANESTHESIOLOGY* 2006; 105:5–7.

\* Professor and Chair of Anesthesiology, † Associate Professor of Anesthesiology, ‡ Assistant Professor of Anesthesiology, § Research Assistant, || Instructor. Accessed February 6, 2006.

Received from the Department of Anesthesiology, Mount Sinai School of Medicine, New York, New York. Submitted for publication June 2, 2005. Accepted for publication February 23, 2006. Support was provided solely from institutional and/or departmental sources. Presented at the Annual Meeting of the American Society of Anesthesiologists, Atlanta, Georgia, October 25, 2005.

Address correspondence to Dr. Reich: One Gustave L. Levy Place, Box 1010, New York, New York 10029. [david.reich@mssm.edu](mailto:david.reich@mssm.edu). Individual article reprints may be accessed at no charge through the Journal Web site, [www.anesthesiology.org](http://www.anesthesiology.org).

DESPITE advances in electronic medical record keeping and the adoption of these systems for clinical activities, there is evidence that the use of electronic medical records to generate automated point-of-care physician charges and submission is very limited. A recent survey by the Spyglass Consulting Group found that of 102 physicians who use and are familiar with healthcare information technology systems, only 21% used automated charge capture (personal communication, Gregg Malkary, Managing Director, Spyglass Consulting Group, Menlo Park, California, January 2005). In contrast, back-office claims submission for most payers, including Medicare, has migrated completely to electronic billing.<sup>1</sup>

McKenzie<sup>2</sup> described several important components of electronic billing systems: acquisition of data, transmission to customers or billing companies, payment, and posting on the corporate receivables system. The complex nature of the data transfers and the difficulties inherent in creating interfaces between different vendors' products are factors that complicate the wide implementation of electronic billing systems.

In 1991, our institution began the use of an anesthesia information management system (AIMS) for electronic medical record keeping (CompuRecord®; Philips Medical Systems, Andover MA) in certain operating rooms. The anesthesia information management system was fully implemented in all operating room locations by 1998. Currently, approximately 30,000 anesthetics are captured per year. CompuRecord has a billing charge generation module, but this would not generate a complete charge voucher in our tertiary care center. Examples of items that are not supported by the CompuRecord module include charge generation for transesophageal echocardiography, ultrasonic vessel finder usage, and some of the data needed to generate the concurrency matrix for a teaching institution. We therefore needed to construct a customized billing data extraction application.

The current report describes the design and implementation of an automated point-of-care anesthesiology electronic charge capture system that extracts data from the anesthesia information management system and transmits it to a billing vendor. We hypothesized that the new billing technology would improve the effectiveness of the billing interface and enhance financial results of the practice.

**Table 1. Raw Data Tables from Anesthesia Information Management System**

|                       |                                                                                                                                                                                               |
|-----------------------|-----------------------------------------------------------------------------------------------------------------------------------------------------------------------------------------------|
| Case information      | Date of service, case identifying information, patient identifying information, patient clinical information, procedure information, practitioner identifying information, procedure location |
| Case times            | Anesthesia start and end times                                                                                                                                                                |
| Case combo selections | Nested pick-list selections for individual cases (including audit-trail flags)                                                                                                                |
| Case text             | Free text entered by user                                                                                                                                                                     |
| Combo configurations  | System configuration table defining the various "combo" selection trees/menus available to users for each case                                                                                |
| Case dates            | Relief dates                                                                                                                                                                                  |
| Decoder               | Table linking numeric-encoded values in tables (e.g., case combo selections) to readable (alphanumeric) text descriptions                                                                     |

## Materials and Methods

We analyzed the effectiveness of the billing interface and financial results of the practice by measuring two parameters: days in accounts receivable and charge lag days.

At the vast majority of anesthetizing sites, the anesthesia information management system collects data derived from anesthesia monitors and machines, clinician-entered items, and data from interfaces with other hospital systems. A subset of the information that is resident in the electronic patient record constitutes the data set that is required to create a valid and compliant physician bill. For the small proportion of handwritten anesthesia records performed in off-site locations or during computer malfunctions, the data relevant to billing are entered manually into the CompuRecord system.

The CompuRecord anesthesia information management system creates a binary file of case information, some of which is duplicated in a relational database, based on user configuration of the system. The relational database has several relevant tables. Each table contains data elements (fields) of various data types that are described below.

Separate sets of tables are populated based upon the specificity of the data to the patient or to the individual anesthesia record, more commonly known as the "case." The largest percentage of the data relevant to an anesthesia bill is derived from those that are recorded using nested pick-lists (aka, drop-down lists) that are specific to an individual case. These combinations of lists of related elements of various data types are referred to as "combos."

Combo pick-lists contain groupings of data fields, links to more deeply nested combos, and free text entry fields. The most common data fields are "static" predefined alphanumeric strings (e.g., "cricoid pressure" or "37 French") that are assigned a numerical code. For efficiency of storage, only the numerical code is stored in the relational database combo table. The mapping of the numerical code to the predefined alphanumeric string is recorded in another (index) table. Additional data types include numbers, dates, times (formatted text), and Boolean categories. For example, choosing an endotracheal tube from a list of airway devices leads to another series

of pick-lists of elements, including the types of tubes (e.g., standard or double lumen), tube sizes, and indications whether the tube was placed by the anesthesia care team or was *in situ*. The majority of such selection trees also contain an "other" field for entry of alphanumeric strings of free text for circumstances where predefined choices are inappropriate.

Some case-specific text fields that are unrelated to combos are stored in a separate table. For example, the procedure/operation performed is populated by the text associated with the full set of Current Procedural Terminology codes (American Medical Association, Chicago, IL), one or more of which are selected by the anesthesiologist. Text searching enables rapid selection of the applicable Current Procedural Terminology code(s) from the complete list. Because surgical and diagnostic procedures are continually updated and sometimes difficult to code accurately, the text field for procedure/operation performed is editable by the anesthesia care team for later review by a certified procedural coder. Dates, procedural events (e.g., procedure/surgery start time), and electronic signatures are stored using an internal encoding system. This information is stored in various tables.

In addition to these classic relational database tables of case-specific and patient-specific information, the data archiving module also writes information from each case to specific reports that combine patient-specific and case-specific data that are the source of much of the information relevant to patient billing. These report tables (table 1) are vendor (*i.e.*, Philips Medical Systems, Andover, MA) specific and cannot be configured by the system administrator.

To create a bill that complies with regulatory requirements and will result in timely payment, each bill for service must include a minimum set of elements. Other additional elements that may not be present in any particular bill are included, as appropriate.

A custom set of tables (table 2) was created in which to assemble all of the data necessary for billing purposes from the existing database. These tables are populated and processed by a series of complex queries using Microsoft Access® (Microsoft, Redmond, WA). The queries perform three basic functions that are the founda-

**Table 2. Reports Provided by Electronic Charge Voucher System to Billing Vendor**

|                            |                                                                                                                                                                                                        |
|----------------------------|--------------------------------------------------------------------------------------------------------------------------------------------------------------------------------------------------------|
| Billing worksheet          | Table containing records for complete and incomplete bills for anesthesia services, populated with data from tables described in table 1 during bill creation/processing (see appendix)                |
| Missing data worksheet     | Worksheet containing various Boolean items indicating which required data elements are missing from cases in the billing worksheet                                                                     |
| Incomplete bill archive    | Table of records with structure identical to billing worksheet containing only incomplete bills                                                                                                        |
| Complete bill archive      | Table of records with structure identical to billing worksheet containing complete bills                                                                                                               |
| Incomplete progress report | Table containing data that have been updated by clinicians from cases that were previously incomplete                                                                                                  |
| Added cases                | Table of records with structure identical to billing worksheet containing data from past cases not submitted in a previous billing cycle due to late arrival of data (e.g., transient network failure) |

tion of the billing system. The first is an initial extraction of information from the anesthesia information management system database that populates a billing worksheet for each new case that is identified. The second function

is the screening of each billing worksheet to ensure that all necessary information is present. The third function is the updating of the billing worksheet with additional information that becomes available after the initial bill-

**Table 3. Electronic Charge Contents and Validation Principles**

| Parameter Group                | Elements                                                                                                                                                                                                                                        | Business Rules                                                                                                                                         |
|--------------------------------|-------------------------------------------------------------------------------------------------------------------------------------------------------------------------------------------------------------------------------------------------|--------------------------------------------------------------------------------------------------------------------------------------------------------|
| Personnel                      | Anesthesiologist(s) (up to 3)<br>Resident(s) (up to 2)<br>CRNAs (up to 2)<br>Attending attestation statements                                                                                                                                   | 1. At least one attending anesthesiologist required.<br>2. Each clinician must have a corresponding e-signature.<br>3. Attending attestation required. |
| Personnel relief               | Relief clinicians<br>Relief date/time                                                                                                                                                                                                           | 1. Each relief clinician must have an associated date/time.<br>2. Each relief date/time must have an associated clinician.                             |
| Surgical procedure information | CPT codes<br>Procedure performed (editable text)<br>Procedure start and end times                                                                                                                                                               | 1. CPT codes optional.<br>2. Procedure performed and start/end times are required.                                                                     |
| Patient information            | Date of birth<br>Medical record number<br>ASA physical status<br>Preoperative diagnosis<br>Postoperative diagnosis                                                                                                                              | 1. All are required.                                                                                                                                   |
| Anesthesia information         | Primary anesthetic technique                                                                                                                                                                                                                    | 1. Required.                                                                                                                                           |
| Anesthesia modifiers           | Autotransfusion<br>Hemodilution<br>Deliberate hypotension<br>Deliberate hypothermia<br>Hypothermic circulatory arrest                                                                                                                           | 1. All are optional.                                                                                                                                   |
| Anesthesia modifiers           | Arterial line placement<br>Central venous line placement<br>Pulmonary artery catheter<br>Jugular bulb catheter<br>Temporary pacemaker insertion<br>Ultrasound usage and indication for vascular cannulation<br>Transesophageal echocardiography | 1. All are optional.<br>2. If present, must have attending attestation of personal performance or medical direction.                                   |
| Billing information            | Special billing instructions<br>PACU care provided during case<br>Case related to global package                                                                                                                                                | 1. All are optional.                                                                                                                                   |

ASA = American Society of Anesthesiologists; CPT = Current Procedural Terminology; CRNA = certified registered nurse anesthetist; PACU = postanesthesia care unit.

**Table 4. Missing Data Report Elements**

1. Service date
2. Internal case ID
3. Case number
4. Medical record number
5. Patient name
6. Patient date of birth
7. Attending anesthesiologist 1
8. Attending anesthesiologist 1 e-signature
9. Attestation comments
10. Attending anesthesiologist 2
11. Relief date/time 1
12. Attending anesthesiologist 2 e-signature
13. Attending anesthesiologist 3
14. Attending anesthesiologist 3 e-signature
15. Relief date/time 2
16. CRNA 1 e-signature
17. CRNA 2 e-signature
18. ASA classification
19. Performed procedure
20. Primary anesthetic technique
21. Preoperative diagnosis
22. Postoperative diagnosis
23. Surgeon
24. Anesthesia start time
25. Anesthesia end time

ASA = American Society of Anesthesiologists; CRNA = certified registered nurse anesthetist; e-signature = electronic signature; ID = identification number.

ing worksheet creation. (The billing worksheet contents are described in the appendix and are subject to change over time.)

One of the tasks inherent in the data extraction process is the necessity of identifying the most current information for a particular case. The relational database design includes both an event index (to indicate the latest information) as well as an include/exclude flag (to indicate deleted information). These design elements are required to create an audit trail of modifications that occur within a case record over time. This complicates the design of the queries that extract the information that is included in the final bill.

The screening function serves to verify that all necessary data are present. The necessity and related business rules applicable to the billing worksheet fields are listed in table 3. Records that pass this screening process are placed in a queue for transmission to the billing vendor. Deficient records are placed in a separate queue, with an associated detailing of the missing elements (table 4). The details of missing required data are transmitted automatically by e-mail to the clinicians involved so they can make necessary changes to the electronic case records.

The data extraction and screening process is performed every business day as a batch process that creates four reports. The first is the queue of new cases that occurred in the time period since the last batch run that have passed the screening process. The second is a report of occasional older cases that were not processed

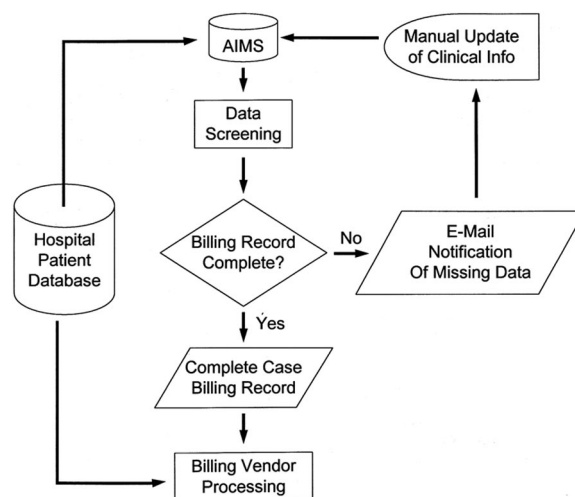

**Fig. 1. Illustration of the process of electronic billing voucher creation.** Information is extracted from the anesthesia information management system (AIMS) database, and a billing worksheet is populated. If the billing record is complete, it is transmitted to the billing vendor. Subsequent reprocessing of the anesthesia records is repeated until each electronic bill voucher is complete. If the record is incomplete, e-mail is sent to the attending anesthesiologist requesting completion of the anesthesia record. With transmission of the electronic billing voucher to the billing vendor, additional data from the hospital patient database are incorporated.

in previous batch runs due to transient hardware/network failures that subsequently pass the screening process. The third report consists of all new and older cases that would have been in the first two reports but did not pass the screening process. The final report includes cases previously found to be incomplete that have been reprocessed and incorporates any new or modified information provided by the clinician as described above. This final report also indicates whether the case has finally passed the screening process and is ready for billing. Patient demographic and financial/insurance information is transmitted to the billing vendor separately from the hospital information technology group.

Figure 1 presents an overall illustration of the process of electronic billing voucher creation.

There was a bimodal implementation of the electronic transfer of data to the billing vendor. In the first phase (June 2004), the vendor began receiving daily reports in comma-delimited format but continued to perform manual entry of the data. Approximately 2 months later, the vendor began direct importation of the data into its custom billing application.

## Results

### *Revenue Opportunities*

Charge lag is defined as the number of days between the date of service and transmission of charge data to the payers. The average charge lag decreased by 7.3 days in the period after the implementation as compared with

Charge Lag During 2004

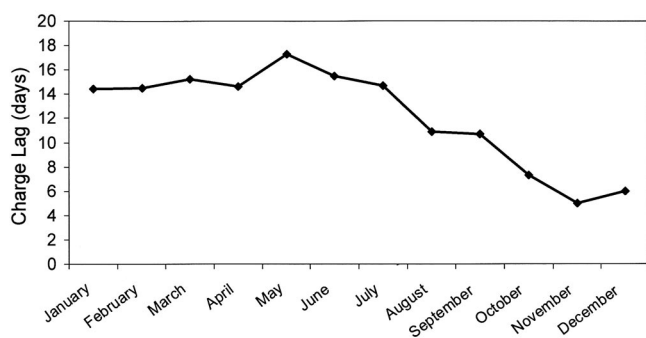

Fig. 2. Charge lag between date of service and transmission to payer. In June 2004, the billing vendor began receiving electronic data, but full implementation occurred over a 2-month period. The average charge lag decreased by 7.3 days in the last 5 months of 2004, compared with the months preceding electronic charge transmission.

the 7-month period preceding the implementation (fig. 2).

We also compared the total days in accounts receivable, controlling for fee schedule changes and credit balances for comparable intervals in the preimplementation and postimplementation periods (January through July 2005, compared with January through July 2004). Total days in accounts receivable equals the total dollars in accounts receivable for the period monitored, divided by the average dollars in gross billing per day. The total days in accounts receivable changed from 100.6 days to 90.5 days (10.1-day decrease) after implementation. The total accounts receivable in the periods monitored was corrected for confounding variables, such as interim fee schedule changes and credit balances that would have altered average daily gross charge and total dollars in accounts receivable. Although accounts receivable write-off policies were applied consistently throughout the period, it is not possible to account for seasonal variations in collection rates or write-offs in the snapshots calculated at the end of each period. The reduction of total days in accounts receivable represented a one-time revenue gain equivalent to 3.0% of total annual receipts. Table 5 details additional information to illustrate the scope of the practice.

#### Cost Savings

Electronic charge transmission eliminates labor costs for manual entry of charge data and eliminates the concomitant human errors inherent in transferring data from handwritten documents. This change reduced labor costs for charge entry by 1 full-time equivalent or approximately \$32,000 per year. Eliminating the need to print, transport, file, and manually retrieve handwritten billing vouchers provides additional cost savings of approximately \$10,000 per year. In addition, 0.5 full-time equivalent of staff assigned to this function was available for other duties.

Table 5. Revenue Cycle Data

| Month | Cases* | Billed RVG Units | FTE Count | Charge Lag, days | Days in A/R |
|-------|--------|------------------|-----------|------------------|-------------|
| 1/04  | 1,356  | 26,620           | 59.6      | 14.4             | 97.1        |
| 2/04  | 2,049  | 38,516           | 59.6      | 14.5             | 104.5       |
| 3/04  | 1,929  | 39,801           | 58.6      | 15.2             | 101.2       |
| 4/04  | 2,159  | 41,698           | 58.6      | 14.6             | 101.8       |
| 5/04  | 1,959  | 39,178           | 57.6      | 17.3             | 103.0       |
| 6/04  | 2,864  | 53,592           | 56.6      | 15.5             | 99.6        |
| 7/04  | 2,142  | 42,111           | 59.5      | 14.7             | 96.7        |
| 8/04  | 2,588  | 50,142           | 60.5      | 10.9             | 89.1        |
| 9/04  | 2,185  | 41,275           | 60.5      | 10.7             | 92.6        |
| 10/04 | 2,270  | 42,468           | 58.9      | 7.3              | 100.1       |
| 11/04 | 2,420  | 45,998           | 58.9      | 5.0              | 101.9       |
| 12/04 | 2,334  | 43,541           | 59.1      | 6.0              | 100.0       |
| 1/05  | 1,864  | 33,520           | 59.1      | 7.5              | 99.8        |
| 2/05  | 2,466  | 44,806           | 58.5      | 8.2              | 96.2        |
| 3/05  | 2,522  | 46,382           | 57.5      | 7.8              | 90.7        |

\* Excluding obstetrics and pain management.

A/R = accounts receivable; FTE = full-time employee equivalents; RVG = American Society of Anesthesiologists Relative Value Guide.

#### Cost Avoidance

The daily billing process identified missing signatures, required data, and contradictory or conflicting data fields, such as relief events. This automatic process prevented submission of incomplete and/or noncompliant bills. This resulted in a nonquantifiable decrease in denials, rework, and potential compliance penalties. Approximately 3% of our electronic records were corrected on the basis of these reviews.

#### Discussion

The current report demonstrates that the implementation of an automated electronic anesthesia charge voucher system decreased the lag time between anesthesia services and charge transmission to payers. This has been associated with an initial increase in total days in accounts receivable as more charges were compressed into a shorter time interval, followed by a sustained improvement that was valued as a one-time revenue gain equivalent to 3% of annual receipts. Ongoing savings related to elimination of a full-time equivalent dedicated to transport, transcription, and handling of handwritten vouchers are additional benefits.

Manual processes, which distance the anesthesiologist from the eventual generation of a bill, have inherent sources of errors and omissions that negatively affect reimbursement. These problems include illegibility, lost or missed cases, incomplete charges, incomplete or inaccurate coding,<sup>3</sup> discrepancies between the clinical documentation and the billing voucher, and delays in submission. It is estimated that the average physician loses approximately 10% of potential revenue due to billing mistakes made at the point of care.<sup>4</sup> It is further estimated that it costs six times the administrative ex-

pense to reprocess a claim than to correctly process it the first time.<sup>5</sup>

Anesthesia information management systems tend to be well accepted by clinicians but have limited market penetration. In a survey, clinicians responded that they experienced a subjective improvement in their quality of work with the use of electronic anesthesia records compared the handwritten records, and after adaptation to a given system, many users reported that they would be reluctant to return to paper records.<sup>6</sup> The further reported benefits of electronic anesthesia records include more accurate recording of physiologic variables,<sup>7</sup> enhanced medicolegal defense and risk management,<sup>8</sup> times savings,<sup>9,10</sup> and increased time devoted to patient monitoring (vigilance).<sup>11</sup> Market penetration, however, has been estimated to be only 3–5% in the United States, as reported on the Anesthesia Patient Safety Foundation Web site.<sup>#</sup>

One of the major reasons for this low market penetration is the capital expenditure associated with anesthesia information management system implementation.<sup>12</sup> Data such as those in the current report may help anesthesia practices develop return-on-investment calculations to support the acquisition of an anesthesia information management system. Although a reduction in days in accounts receivable can be assigned a monetary value with some degree of certainty, there remain other less tangible economic benefits of anesthesia information management system billing voucher generation, including enhancements to compliance, concurrency matrix calculations, and managed care negotiations.

Improved billing and regulatory compliance result when electronic charges are generated directly from the medical record source documents. This provides the highest level of assurance that the charges reflect the level and scope of service provided. The anesthesia information management system used in the authors' institution is designed to incorporate mandatory documentation fields to remind physicians to include required attestations and supporting documentation. The anesthesia information management system serves as an automated audit mechanism to prevent incomplete or noncompliant records from proceeding to charge generation. The potential for avoiding penalties related to federal payer (Physicians at Teaching Hospitals, Office of the Inspector General, and Centers for Medicare and Medicaid Services) audits represent additional potential cost savings. Because of the cost-avoidance nature of these opportunities, they are difficult to quantify. Nevertheless, approximately 3% of our electronic records are corrected before charges are generated.

Anesthesia practices are subject to complex billing requirements, such as the reporting of concurrent care provided under medical direction and medical supervi-

sion. As a result, the synchronization of timepieces and the accurate recording of case start and stop times are critical. Electronic provision of all time intervals facilitates an accurate and timely completion of the concurrency matrix process.

The anesthesia information management system provides a critical database that can be used to value bargaining mix elements involved in negotiations with managed care entities and hospitals. Understanding the impact of contract clauses that require bundling of services or the capping of reimbursement for certain business lines allows practices to negotiate with a firm understanding of the costs and potential tradeoffs represented by contract terms. They also provide a valuable source of information tracking the introduction of new services that may need to be added to fee schedules upon contract renegotiation.

Others have reported that electronic claim submission results in faster reimbursement. Wang *et al.*<sup>13</sup> performed a cost-benefit analysis in an ambulatory primary care setting to analyze the financial effects of electronic medical record systems. They estimated that billing capture would increase by 2% and the supplying or prompting of required billing fields would decrease billing error losses by 35–95%. They calculated a potential net benefit of \$86,400 per provider with the use of an electronic medical record over a 5-yr period. In a survey of healthcare providers, electronic transaction processing resulted in a lower average cost per claim, a lower average rejection rate for initial and follow-up claims, and a shorter turnaround time on accounts receivable than paper-based claims.<sup>1</sup> In a tertiary care pediatric practice, the effects of the conversion to electronic bill submission from attending physicians to the billing vendor was analyzed.<sup>14</sup> This resulted in the receipt of patient charges in 6–13 fewer days by the billing vendor, and a significant decrease in the lag time between patient service and charges being posted to the patients' accounts by 9–17 days. At 14 days, 93% of the electronic bills were posted to the patient's accounts compared with 19% of the paper bills. There were no significant differences in collection rates. A case study of an 8-physician orthopedic surgical group reported that the proportion of lost and/or missed bills was reduced from 6% to 0% after implementation of a handheld personal computer-based point-of-care charge system.<sup>5</sup> They also reported a reduction of 85% in the mean lead time for claims submission (from 33 days to 5 days), a reduction of 30% in write-offs for late claims, as well as a reduction of 0.25 full-time equivalent. A 70-physician general surgical group also reported a complete elimination of write-offs for late claims, as well as a significant reduction in lost claims.<sup>15</sup> Electronic bill submission has also been demonstrated to result in significant cost savings to anesthesiology groups. In an audit by a Japanese anesthesia group, charges generated by a handwritten billing sheet were

<sup>#</sup> <http://www.apsf.org/initiatives/infosys.msp>. Accessed June 8, 2006.

compared to anesthesia bills generated by an anesthesia information management system.<sup>16</sup> This electronic billing system derived costs from the anesthesia information management system and calculated fees according to the Japanese national healthcare insurance system. This electronic system was demonstrated to be accurate compared with the manual bill generation system and prevented ¥2.5 million (approximately \$20,000) in billing losses per month.

The limitations of the current report relate to concurrent changes that occurred in departmental operations at the time of implementation of electronic charge transmission. The adoption of a productivity-based compensation model provided incentive to anesthesiology faculty for more complete billing documentation, such as selecting Current Procedural Terminology codes that most fully describe the services performed, 100% case capture, and documenting all reimbursable services, ancillary procedures, and patient status modifiers. Therefore, an unknown proportion of the observed increase in the average daily charges is related to a concurrent focus on physician education and incentives leading to better billing documentation and/or increased productivity. Other factors that would affect the valuation of the decrease in days in accounts receivable include changes in the charge fee schedule, managed care organization participation status, and operational and collection policy changes that affect the gross collection rate. Despite these immeasurable effects, the relative parity between the reduction in charge lag and the reduction in days in accounts receivable suggests that the results reported are related mainly to electronic charge transmission.

In many healthcare organizations, the anesthesia information management system is purchased by a hospital that is a distinct financial entity that receives no financial benefit from the anesthesia billing process. In many institutions, therefore, a partnership between the hospital (that receives the financial benefit of a capital purchase) and the anesthesia practice group must be created that accounts for the purchase, ongoing expenses, and financial advantages of an anesthesia information management system. Data sharing between the two entities is also an important consideration in creating a successful partnership.

One of the costs of implementing an automated anes-

thesia charge voucher system from an anesthesia information management system data source is the programming requirements. At the authors' academic institution, the existing departmental programming personnel diminished the investment needed to create the charge voucher system. Many institutions would have to consider this cost in their return-on-investment calculations.

In conclusion, anesthesia information management systems yield financial and operational benefits by speeding up the revenue cycle and by reducing direct costs and compliance risks related to the billing and collection processes. The observed reductions in days in accounts receivable may be of benefit in calculating the return on investment that is attributable to the adoption of an anesthesia information management system and electronic charge transmission.

## References

1. Ahmadi M, Helms M, Ross T: The determinants of outsourcing electronic billing: An empirical study in the United States health care industry. *Int J Manage* 2001; 18:509-14
2. McKenzie P: Coming to grips with electronic billing. *Energy Markets* 2001; 6:62-3
3. Lorence DP, Ibrahim IA: Disparity in coding concordance: Do physicians and coders agree? *J Health Care Finance* 2003; 29:43-53
4. Terry K: How the device in your hand can put money in your pocket: Code diagnoses and services on a PDA, and watch revenues soar. *Med Econ* 2001; 78:44-52
5. Garrity C: Automated charge capture at the point of care increases revenue. *Healthcare Financial Manage* 2001; 55:66-71
6. Quinzio L, Junger A, Gottwald B, Benson M, Hartmann B, Jost A, Banzhaf A, Hempelmann G: User acceptance of an anaesthesia information management system. *Eur J Anaesthesiol* 2003; 20:967-72
7. Devitt JH, Rapanos T, Kurrek M, Cohen MM, Shaw M: The anesthetic record: Accuracy and completeness. *Can J Anaesth* 1999; 46:122-8
8. Feldman JM: Do anesthesia information systems increase malpractice exposure? Results of a survey. *Anesth Analg* 2004; 99:840-3
9. Kennedy PJ, Feingold A, Wiener EL, Hosek RS: Analysis of tasks and human factors in anesthesia for coronary-artery bypass. *Anesth Analg* 1976; 55:374-7
10. McDonald JS, Dzwonczyk R, Gupta B, Dahl M: A second time-study of the anesthetist's intraoperative period. *Br J Anaesth* 1990; 65:841-2
11. Weinger MB, Herndon OW, Gaba DM: The effect of electronic record keeping and transesophageal echocardiography on task distribution, workload, and vigilance during cardiac anesthesia. *ANESTHESIOLOGY* 1997; 87:144-55
12. Stefanadis C: Why hasn't electronic bill presentment and payment taken off? *Curr Issues Econ Finance* 2002; 8:1-6
13. Wang SJ, Middleton B, Prosser LA, Bardon CG, Spurr CD, Carchidi PJ, Kittler AF, Goldszer RC, Fairchild DG, Sussman AJ, Kuperman GJ, Bates DW: A cost-benefit analysis of electronic medical records in primary care. *Am J Med* 2003; 114:397-403
14. Beckett PR, Spare WL, Kirkland JL: Improved inpatient billing metrics by physician-directed billing software. *J Health Care Finance* 2000; 26:70-7
15. Moore F: Finders keepers: Automated charge capture returns precious time to physicians. *Health Manage Technol* 2002; 23:36-37
16. Okamura A, Murayama H, Sato N, Kemmotsu O: Automated anesthesia billing by electronic anesthesia record keeping system. *Masui* 1999; 48:903-8

## Appendix: Raw Data Extracted or Calculated from Electronic Anesthesia Record

| Data Element                              | Data Type    | Multiple Instances Allowed? | Required? | Table Source               |
|-------------------------------------------|--------------|-----------------------------|-----------|----------------------------|
| Patient name                              | Alphanumeric | N                           | Y         | Case information           |
| Medical record number                     | Alphanumeric | N                           | Y         | Case information           |
| Sex                                       | Alphanumeric | N                           | N         | Case information           |
| Birth date                                | Date/time    | N                           | Y         | Case information           |
| Date of service                           | Date/time    | N                           | Y         | Case information           |
| Age, yr                                   | Number       | N                           | N         | Calculated                 |
| Patient class                             | Alphanumeric | N                           | N         | Case information           |
| Performed procedure                       | Alphanumeric | N                           | Y         | Case information           |
| Primary technique                         | Alphanumeric | N                           | Y         | Case information           |
| Secondary technique                       | Alphanumeric | N                           | N         | Case information           |
| Position                                  | Alphanumeric | N                           | N         | Case information           |
| Surgical field avoidance                  | Boolean      | N                           | N         | Combo included             |
| ASA status                                | Number       | N                           | Y         | Case information           |
| Emergency                                 | Boolean      | N                           | N         | Case information           |
| Primary surgeon                           | Alphanumeric | N                           | Y         | Case information           |
| Attendings                                | Alphanumeric | Y                           | Y         | Case information           |
| Residents                                 | Alphanumeric | Y                           | N         | Case Combo selections      |
| CRNAs                                     | Alphanumeric | Y                           | Y         | Case combo selections      |
| SRNAs                                     | Alphanumeric | Y                           | N         | Case combo selections      |
| Electronic signatures                     | Boolean      | N                           | Y         | Case Combo Selections      |
| Attestation statement                     | Boolean      | N                           | Y         | Case combo selections      |
| Anesthesia start                          | Date/time    | N                           | Y         | Case times                 |
| Anesthesia end                            | Date/time    | N                           | Y         | Case times                 |
| Duration of anesthesia, min               | Number       | N                           | N         | Calculated                 |
| Relief time                               | Date/time    | N                           | N         | Case text                  |
| Person relieved 1, 2, 3                   | Alphanumeric | Y                           | N         | Case combo selections      |
| Person relieving 1, 2, 3                  | Alphanumeric | Y                           | N         | Case combo selections      |
| Relief events                             | Date/time    | Y                           | N         | Case text                  |
| Preoperative diagnosis                    | Alphanumeric | N                           | Y         | Case text                  |
| Postoperative diagnosis                   | Alphanumeric | N                           | Y         | Case text                  |
| Age less than 1 yr                        | Boolean      | N                           | N         | Calculated                 |
| Age greater than 70 yr                    | Boolean      | N                           | N         | Calculated                 |
| Intraarterial line 1                      | Boolean      | N                           | N         | Case combo selections      |
| Intraarterial line 2                      | Boolean      | N                           | N         | Case combo selections      |
| Central venous line or introducer 1       | Boolean      | N                           | N         | Case combo selections      |
| Central venous line or introducer 2       | Boolean      | N                           | N         | Case combo selections      |
| Pulmonary artery catheter                 | Boolean      | N                           | N         | Case combo selections      |
| Jugular bulb catheter                     | Boolean      | N                           | N         | Case combo selections      |
| CPT codes                                 | Alphanumeric | Y                           | N         | Case combo selections      |
| TEE CPT code(s)                           | Boolean      | Y                           | N         | Case combo selections      |
| TEE ICD-9 code(s)                         | Alphanumeric | Y                           | N         | Case combo selections      |
| Deliberate hypotension                    | Boolean      | N                           | N         | Case combo selections      |
| Deliberate hypothermia                    | Boolean      | N                           | N         | Case combo selections      |
| Hypothermic circulatory arrest            | Boolean      | N                           | N         | Case combo selections      |
| Hemodilution                              | Boolean      | N                           | N         | Case combo selections      |
| Autotransfusion                           | Boolean      | N                           | N         | Case combo selections      |
| Ultrasonic vessel finder use              | Boolean      | N                           | N         | Case combo selections      |
| Indication(s) for vessel finder use       |              |                             |           |                            |
| Previous attempts unsuccessful            | Boolean      | N                           | N         | Case combo selections      |
| Difficult anatomy                         | Boolean      | N                           | N         | Case combo selections      |
| Coagulopathy                              | Boolean      | N                           | N         | Case combo selections      |
| Nerve block                               | Boolean      | N                           | N         | Case combo selections      |
| Other                                     | Alphanumeric | N                           | N         | Case combo selections      |
| Teaching regulations                      | Boolean      | N                           | N         | Case combo selections      |
| Case concurrent                           | Boolean      | N                           | N         | Case combo selections      |
| PACU care during case                     | Boolean      | N                           | N         | Case combo selections      |
| Case related to transplant in Mount Sinai | Boolean      | N                           | N         | Case combo selections      |
| Bill patient for co-pay/deductible only   | Boolean      | N                           | N         | Case combo selections      |
| Billing comments                          | Alphanumeric | N                           | N         | Case text                  |
| Internal case ID                          | Number       | N                           | Y         | Case information           |
| Case number                               | Alphanumeric | N                           | Y         | Case information           |
| QV modifier                               | Alphanumeric | N                           | N         | Research modifier          |
| Location                                  | Alphanumeric | N                           | N         | Case information           |
| Case complete                             | Boolean      | N                           | N         | Updated by billing program |

ASA = American Society of Anesthesiologists; CPT = Current Procedural Terminology; CRNA = certified registered nurse anesthetist; ICD-9 = International Classification of Diseases, 9th edition; ID = identification number; PACU = postanesthesia care unit; QV = indicates routine care given under an approved clinical trial; SRNA = student registered nurse anesthetist; TEE = transesophageal echocardiography.
